# Supplementary material for: I Like This New Me: Unravelling Population Structure of Mediterranean Electric Rays and Taxonomic Uncertainties within Torpediniformes
Source: MDPI journal article supplement (doi:10.3390/ani13182899), 2023-09-13
Supplement: s1 [file s1]

**Figure S1. BAPS**

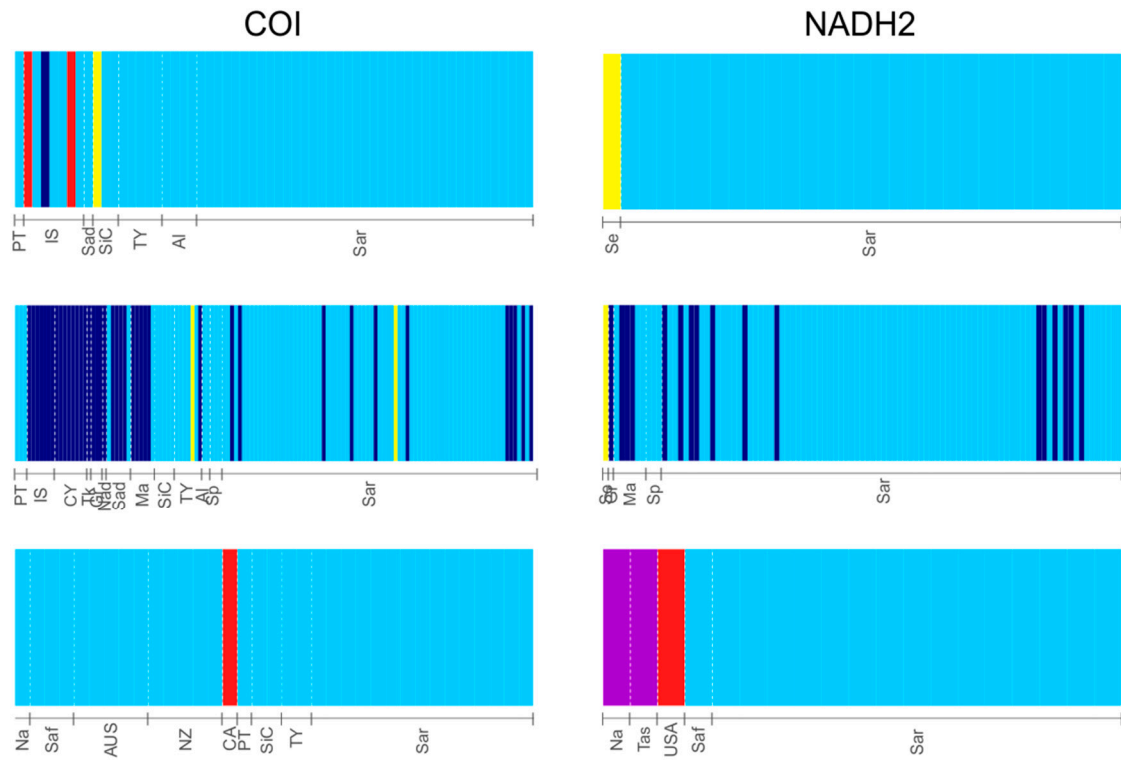

Figure S1. COI and NADH2 outputs performed using BAPS for *T. torpedo* (top), *T. marmorata* (middle) and *T. nobiliana* (bottom). The codes for the locations are described in the caption of SM4. Sar= Sardinian samples.
