# Supplementary material for: I Like This New Me: Unravelling Population Structure of Mediterranean Electric Rays and Taxonomic Uncertainties within Torpediniformes
Source: MDPI journal article supplement (doi:10.3390/ani13182899), 2023-09-13
Supplement: s1 [file s1]

## SM 4. AMOVA

Table S4.1. Results of AMOVA for COI, and NADH2 datasets for the *T. marmorata* Sardinian sequences. \*\*\* = P-values < 0.001; \*\* = P-value <0.01; \* = P-value <0.05. Between parentheses are the locations as shown in Figure 1. S= south, SW = southwestern, N = north, NW = northwestern, E = east, NE = northeast, W = west.

| <i>T. marmorata</i> COI (Sardinia)       |                         |                        |         |
|------------------------------------------|-------------------------|------------------------|---------|
| Source of variation                      | Percentage of variation | Fixation Index         | P-value |
| <b>One group</b>                         |                         |                        |         |
| Among populations                        | 14.90                   | $\Phi_{ST} = 0.149$    | **      |
| Within populations                       | 85.10                   |                        |         |
| <b>Two groups (N+SW+NW+W / S+E+NE)</b>   |                         |                        |         |
| Among groups                             | -15.66                  | $\Phi_{CT} = -0.15658$ | ns      |
| Among populations                        | 26.83                   | $\Phi_{SC} = 0.23196$  | **      |
| Within populations                       | 88.83                   | $\Phi_{ST} = 0.11170$  | **      |
| <b>Three groups (N+NE+NW / W+SW/S+E)</b> |                         |                        |         |
| Among groups                             | -0.71                   | $\Phi_{CT} = 0.007$    | ns      |
| Among populations                        | 20.39                   | $\Phi_{SC} = 0.202$    | ***     |
| Within populations                       | 80.32                   | $\Phi_{ST} = 0.197$    | ***     |
| <i>T. marmorata</i> NADH2 (Sardinia)     |                         |                        |         |
| <b>One group</b>                         |                         |                        |         |
| Among populations                        | 13.08                   | $\Phi_{ST} = 0.131$    | **      |
| Within populations                       | 86.92                   |                        |         |
| <b>Two groups (N+SW+NW+W / S+E+NE)</b>   |                         |                        |         |
| Among groups                             | -8.98                   | $\Phi_{CT} = -0.089$   | ns      |
| Among populations                        | 19.79                   | $\Phi_{SC} = 0.181$    | **      |
| Within populations                       | 89.19                   | $\Phi_{ST} = 0.108$    | **      |
| <b>Three groups (N+NE+NW / W+SW/S+E)</b> |                         |                        |         |
| Among groups                             | 0.33                    | $\Phi_{CT} = 0.003$    | ns      |
| Among populations                        | 4.38                    | $\Phi_{SC} = 0.047$    | ns      |
| Within populations                       | 95.3                    | $\Phi_{ST} = 0.047$    | *       |

Table S4.2. Results of AMOVA for COI, and NADH2 datasets for the *T. torpedo* Sardinian sequences. \*\*\* = P-values < 0.001; \*\* = P-value <0.01; \* = P-value <0.05. Between parentheses are the locations as shown in Figure 1. S= south, N = north, NE = northeast, W = west.

| <i>T. torpedo</i> COI (Sardinia)      |                         |                      |         |
|---------------------------------------|-------------------------|----------------------|---------|
| Source of variation                   | Percentage of variation | Fixation Index       | P-value |
| <b>One group</b>                      |                         |                      |         |
| Among populations                     | 18.86                   | $\Phi_{ST} = 0.188$  | *       |
| Within populations                    | 81.14                   |                      |         |
| <b>Two groups (N+W / NE+S)</b>        |                         |                      |         |
| Among groups                          | -45.14                  | $\Phi_{CT} = -0.451$ | ns      |
| Among populations                     | 58.72                   | $\Phi_{SC} = 0.404$  | ns      |
| Within populations                    | 86.42                   | $\Phi_{ST} = 0.136$  | *       |
| <b>Three groups (N+NE / W/S)</b>      |                         |                      |         |
| Among groups                          | -197.15                 | $\Phi_{CT} = -1.971$ | ns      |
| Among populations                     | 215.65                  | $\Phi_{SC} = 0.725$  | ns      |
| Within populations                    | 81.5                    | $\Phi_{ST} = 0.185$  | *       |
| <i>T. torpedo</i> NADH2 (Sardinia)    |                         |                      |         |
| <b>One group</b>                      |                         |                      |         |
| Among populations                     | -3.82                   | $\Phi_{ST} = -0.038$ | ns      |
| Within populations                    | 103.82                  |                      |         |
| <b>Two groups (N+NW+W / NE+S)</b>     |                         |                      |         |
| Among groups                          | 21.73                   | $\Phi_{CT} = 0.217$  | ns      |
| Among populations                     | -21.41                  | $\Phi_{SC} = -0.273$ | ns      |
| Within populations                    | 99.69                   | $\Phi_{ST} = 0.003$  | ns      |
| <b>Three groups (N+NE+NW / W / S)</b> |                         |                      |         |
| Among groups                          | 14.54                   | $\Phi_{CT} = 0.145$  | ns      |
| Among populations                     | -9.31                   | $\Phi_{SC} = -0.109$ | ns      |
| Within populations                    | 94.77                   | $\Phi_{ST} = 0.052$  | ns      |

Table S4.3. Results of AMOVA for COI, and NADH2 datasets for the *T. nobiliana* Sardinian sequences. \*\*\* = P-values < 0.001; \*\* = P-value <0.01; \* = P-value <0.05.

| <i>T. nobiliana</i> COI (Sardinia)   |                         |                      |         |
|--------------------------------------|-------------------------|----------------------|---------|
| Source of variation                  | Percentage of variation | Fixation Index       | P-value |
| <b>One group</b>                     |                         |                      |         |
| Among populations                    | -90.38                  | $\Phi_{ST} = -0.904$ | ns      |
| Within populations                   | 190.38                  |                      |         |
| <i>T. nobiliana</i> NADH2 (Sardinia) |                         |                      |         |
| <b>One group</b>                     |                         |                      |         |
| Among populations                    | 46.58                   | $\Phi_{ST} = 0.466$  | ns      |
| Within populations                   | 53.42                   |                      |         |

Table S4.4 Results of AMOVA tested on the base of BAPS results for COI and NADH2 datasets for *T. marmorata*. Between parentheses are the Sardinian locations as shown in Figure 1 (S= south, SW = southwestern, N = north, NW = northwestern, E = east, NE = northeast, W = west), as well as other locations of sequences retrieved in public repositories: Atlantic Ocean (PT = Portugal, Se = Senegal) - Western Mediterranean (TY = Tyrrhenian Sea, Sp = Spain, Al = Algeria) - Central Mediterranean (Ma= Malta, SiC = Sicily, Nad =North Adriatic Sea, Sad = South Adriatic Sea) - Eastern Mediterranean (IS = Israel CY = Cyprus, Tk= Turkey, GR = Greece).

| <i>T. marmorata</i> COI (all sequences)                                       |                         |                     |         |
|-------------------------------------------------------------------------------|-------------------------|---------------------|---------|
| Source of variation                                                           | Percentage of variation | Fixation Index      | P-value |
| <b>One group</b>                                                              |                         |                     |         |
| Among populations                                                             | 53.31                   | $\Phi_{ST} = 0.533$ | ***     |
| Within populations                                                            | 46.69                   |                     |         |
| <b>Two groups (PT+Nad+SiC+N+SW+NW+W+S+E+NE+TY+Sp+Al / IS+CY+TK+GR+Sad+MA)</b> |                         |                     |         |
| Among groups                                                                  | 57.58                   | $\Phi_{CT} = 0.575$ | ***     |
| Among populations                                                             | 11.27                   | $\Phi_{SC} = 0.265$ | ***     |
| Within populations                                                            | 31.15                   | $\Phi_{ST} = 0.688$ | ***     |
| <i>T. marmorata</i> NADH2 (all sequences)                                     |                         |                     |         |
| <b>One group</b>                                                              |                         |                     |         |
| Among populations                                                             | 30.95                   | $\Phi_{ST} = 0.309$ | ***     |
| Within populations                                                            | 69.05                   |                     |         |
| <b>Three groups (Se / Sp+N+SW+NW+W+S+E+NE / GR+MA)</b>                        |                         |                     |         |
| Among groups                                                                  | 55.46                   | $\Phi_{CT} = 0.555$ | *       |
| Among populations                                                             | 6.07                    | $\Phi_{SC} = 0.136$ | **      |
| Within populations                                                            | 38.47                   | $\Phi_{ST} = 0.615$ | ***     |

Table S4.5. Results of AMOVA tested on the base of BAPS results for COI and NADH2 datasets for *T. torpedo*. Between parentheses are the Sardinian locations as shown in Figure 1 (S= south, N = north, NE = northeast, W = west), as well as other locations of sequences retrieved in public repositories: Atlantic Ocean (PT = Portugal, Se = Senegal) - Western Mediterranean (TY = Tyrrhenian Sea, AI = Algeria) - Central Mediterranean (SiC = Sicily, Sad = South Adriatic Sea) - Eastern Mediterranean (IS = Israel).

| <i>T. torpedo</i> COI (all sequences)                  |                         |                     |         |
|--------------------------------------------------------|-------------------------|---------------------|---------|
| Source of variation                                    | Percentage of variation | Fixation Index      | P-value |
| <b>One group</b>                                       |                         |                     |         |
| Among populations                                      | 22.73                   | $\Phi_{ST} = 0.227$ | *       |
| Within populations                                     | 77.27                   |                     |         |
| <b>Two groups (PT+TY+AI+N+NE+W+S / IS+Sad+SiC)</b>     |                         |                     |         |
| Among groups                                           | 12.36                   | $\Phi_{CT} = 0.123$ | *       |
| Among populations                                      | 16.34                   | $\Phi_{SC} = 0.186$ | ns      |
| Within populations                                     | 71.30                   | $\Phi_{ST} = 0.287$ | *       |
| <b>Two groups (PT+TY+AI+N+NE+W+S+Sad+SiC / IS)</b>     |                         |                     |         |
| Among groups                                           | 22.78                   | $\Phi_{CT} = 0.228$ | ns      |
| Among populations                                      | 13.01                   | $\Phi_{SC} = 0.168$ | ns      |
| Within populations                                     | 64.21                   | $\Phi_{ST} = 0.358$ | *       |
| <b>Three groups (PT+TY+AI+N+NE+W+S / IS / Sad+SiC)</b> |                         |                     |         |
| Among groups                                           | 26.87                   | $\Phi_{CT} = 0.269$ | *       |
| Among populations                                      | 8.43                    | $\Phi_{SC} = 0.115$ | ns      |
| Within populations                                     | 64.70                   | $\Phi_{ST} = 0.353$ | *       |
| <i>T. torpedo</i> NADH2 (all sequences)                |                         |                     |         |
| <b>One group</b>                                       |                         |                     |         |
| Among populations                                      | 80.23                   | $\Phi_{ST} = 0.802$ | ns      |
| Within populations                                     | 19.77                   |                     |         |
| <b>Two groups (Se / N+NW+W+NE+S)</b>                   |                         |                     |         |
| Among groups                                           | 51.02                   | $\Phi_{CT} = 0.510$ | ns      |
| Among populations                                      | 2.79                    | $\Phi_{SC} = 0.057$ | ns      |
| Within populations                                     | 46.20                   | $\Phi_{ST} = 0.538$ | ns      |

Table S4.6. Results of AMOVA tested on the base of BAPS results for COI and NADH2 datasets for *T. nobiliana*. Between parentheses are the Sardinian locations as shown in Figure 1 (S= south, E = east, W = west), as well as other locations of sequences retrieved in public repositories: Atlantic Ocean (CA = Canada, PT = Portugal, USA) - Western Mediterranean (TY = Tyrrhenian Sea) - Central Mediterranean (SiC = Sicily) - Saf = South Africa - AUS = Australia, NZ = New Zealand, Tas = Tasman Sea - Na = not available.

| <i>T. nobiliana</i> COI (all sequences)                |                         |                     |         |
|--------------------------------------------------------|-------------------------|---------------------|---------|
| Source of variation                                    | Percentage of variation | Fixation Index      | P-value |
| <b>One group</b>                                       |                         |                     |         |
| Among populations                                      | 63.36                   | $\Phi_{ST} = 0.633$ | ***     |
| Within populations                                     | 36.64                   |                     |         |
| <b>Two groups (Na+Saf+AUS+NZ+PT+SiC+TY+E+S+W / CA)</b> |                         |                     |         |
| Among groups                                           | 91.53                   | $\Phi_{CT} = 0.915$ | ns      |
| Among populations                                      | 3.05                    | $\Phi_{SC} = 0.359$ | **      |
| Within populations                                     | 5.42                    | $\Phi_{ST} = 0.946$ | ***     |
| <i>T. nobiliana</i> NADH2 (all sequences)              |                         |                     |         |
| <b>One group</b>                                       |                         |                     |         |
| Among populations                                      | 83.95                   | $\Phi_{ST} = 0.839$ | ***     |
| Within populations                                     | 16.05                   |                     |         |
| <b>Two groups (Na+Tas+Saf+E+S+W / USA)</b>             |                         |                     |         |
| Among groups                                           | 79.60                   | $\Phi_{CT} = 0.796$ | ns      |
| Among populations                                      | 14.66                   | $\Phi_{SC} = 0.718$ | **      |
| Within populations                                     | 5.75                    | $\Phi_{ST} = 0.942$ | ***     |
